# Supplementary material for: Hidden negative linear compressibility in lithiuml-tartrate
Source: Royal Society of Chemistry journal article supplement (doi:10.1039/c6cp08690j), 2017-01-01
Supplement: c6cp08690j1.pdf [file c6cp08690j1.pdf]

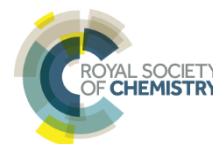

PCCP

## ELECTRONIC SUPPLEMENTARY INFORMATION

### Hidden negative linear compressibility in lithium L-tartrate

H. H.-M. Yeung, R. Kilmurray, C. L. Hobday, S. C. McKellar, A. K. Cheetham, D. R. Allan and S. A. Moggach

#### S1. Detailed Experimental Section

##### Synthetic procedure.

All chemical reagents were used as-received: L-tartaric acid ( $\geq 98\%$ , Sigma-Aldrich), lithium acetate dihydrate (98 %, Fisher Scientific U.K.), ethanol (reagent grade, Fisher Scientific U.K.) and in-house deionized water. L-tartaric acid (1 mmol) and lithium acetate dihydrate (2 mmol) were placed in a stainless steel autoclave with PTFE-liner in the reaction tubes with minimal mixing, followed by water:ethanol (1:2, 10 mL). The autoclave was sealed tightly and placed in an oven at 150 °C for one week, before being allowed to cool to room temperature and opened, yielding large slab-shaped single crystals of **1**.

##### Variable-pressure crystallography.

High-pressure experiments were carried out using a modified Merrill-Bassett diamond anvil cell (DAC) equipped with 600  $\mu\text{m}$  culet diamonds and a tungsten gasket.<sup>1</sup> A single-crystal of in lithium L-tartrate ( $\text{Li}_2(\text{L-C}_4\text{H}_4\text{O}_6)$ , denoted **1** in the text) and a chip of ruby were loaded into the DAC with a 4:1 by volume mixture of methanol:ethanol as a hydrostatic media. The pressure inside the DAC was measured using the ruby fluorescence method.<sup>2</sup>

A sphere of data were collected for a single-crystal of  $\text{Li}_2(\text{L-C}_4\text{H}_4\text{O}_6)$  at ambient pressure and temperature. The data were collected on a Bruker SMART APEXII diffractometer using graphite monochromated Mo K $\alpha$  radiation ( $\lambda = 0.71073 \text{ \AA}$ ). These data were used as a reference for the high-pressure data which were also collected at ambient temperature. The data were integrated using the program SAINT, and the absorption correction was carried out using the program SADABS.<sup>3</sup> All of the obtained data were refined against  $F^2$  using CRYSTALS.<sup>4</sup> The structure was refined anisotropically against  $F^2$ . H-atoms attached to C-atoms were placed geometrically, while the hydroxyl H-atoms were found in a difference map, and refined. A distance restraint ( $\text{O-H} = 0.84, 0.01$ ) was applied to the hydroxyl H-atoms.

Laboratory high-pressure diffraction data were collected on the same crystal on a Bruker SMART APEXII diffractometer using graphite monochromated Mo K $\alpha$  radiation ( $\lambda = 0.71073 \text{ \AA}$ ). Data were collected in  $\omega$ -scans in twelve settings of  $2\theta$  and  $\varphi$  with a frame time and step size of one second and  $0.3^\circ$  respectively. This collection strategy was based on that described by Dawson *et al.*<sup>5</sup> In a similar method to the ambient data, the high pressure data were integrated using the program SAINT.<sup>6</sup> In order to prevent the integration of regions in the diffraction pattern that had been shaded by the pressure cell, 'dynamic masks' were used. The absorption correction was carried out using the programs SHADE<sup>7</sup> and SADABS<sup>3</sup> to correct for adsorption from the pressure cell and sample, respectively. Data were collected from 0.14 up to 4.00 GPa, however, only the data collected from sample pressures of 0.14, 0.68, 1.12 and 2.59 GPa were used in the analysis of this experiment. This is because the sample had become dislodged in the DAC and at these 4 pressures minimal sample movement was observed, and the data could be processed.

In order to obtain better data to higher pressures, a second crystal of  $\text{Li}_2(\text{L-C}_4\text{H}_4\text{O}_6)$  was loaded inside a DAC and diffraction data collected on station I19 at the DIAMOND Light Source, Rutherford Appleton Laboratory, with a Rigaku Saturn 724 CCD detector using synchrotron radiation ( $\lambda = 0.5159 \text{ \AA}$ ). Data collections were carried out using an exposure time and a step size of 1 second and 0.5 degrees respectively. The data were integrated using the programme SAINT using dynamic masks, these mask the regions of the detector which are shaded due to the pressure cell.<sup>6</sup> Omission of shaded reflections, absorption correction and merging of data were carried out in a three-step process, firstly with the programme SHADE,<sup>7</sup> then SADABS<sup>3</sup> and finally XPREP.<sup>8</sup>

High pressure structure refinements were carried out in CRYSTALS.<sup>4</sup> Non-hydrogen atoms were refined isotopically against  $F^2$  for all laboratory and synchrotron high-pressure data. All 1,2 and 1,3 distances for the L-tartrate were restrained, whilst all torsion angles and Li-O bond distances were allowed to freely refine. Vibrational and thermal similarity restraints were also applied. H-atoms attached to C-

atoms were placed geometrically, while the hydroxyl H-atoms were found in a difference map, and refined for the synchrotron data. Once converged, these were then constrained to ride on the parent O-atom.

**Variable-temperature crystallography.**

X-ray diffraction was performed on an Oxford Diffraction Gemini E Ultra diffractometer using Mo radiation ( $\lambda = 0.7107 \text{ \AA}$ , operating at 50 kV and 40 mA). Data were collected at intervals of 10 K from 120 K to 490 K using  $\omega$  scans. An Eos CCD plate detector was used with mean detector area resolution  $16.1 \text{ pixels mm}^{-1}$ . Data collection, cell determination, transformation and refinement, intensity integration and face indexation were performed using CrysAlisPro software.<sup>9</sup> Structures were solved by direct methods and full matrix least-squares refinements against  $|F^2|$  were carried out using the OLEX2 programme.<sup>10</sup> All non-hydrogen atoms were refined anisotropically; hydrogen atoms were then inserted using a riding model and refined with isotropic displacement parameters constrained to 1.2 and 1.5 times those of their adjacent carbon (non-methyl), and oxygen and methyl carbon atoms, respectively. Where the automatic choice of monoclinic cell produced a setting different to the original ambient temperature/pressure one, it was transformed using the matrix  $\begin{bmatrix} 1 & 0 & -1 & 0 & -1 & 0 & 0 & 0 & -1 \end{bmatrix}$  to produce the same setting as original.

## S2. Crystal structure and properties

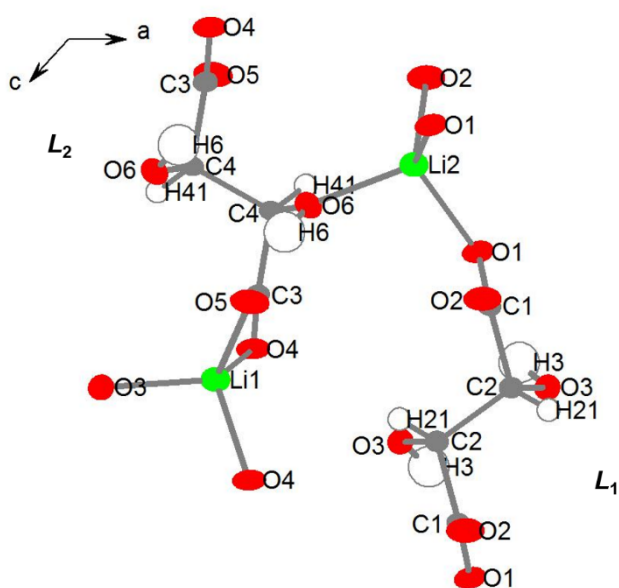

**Figure S1.** Extended asymmetric unit of lithium L-tartrate, **1**, viewed approximately down the *b*-axis, showing C, H, Li and O atoms in grey, white, green and red, respectively. Crystallographically distinct ligands are labelled L1 and L2 as described in the main text.

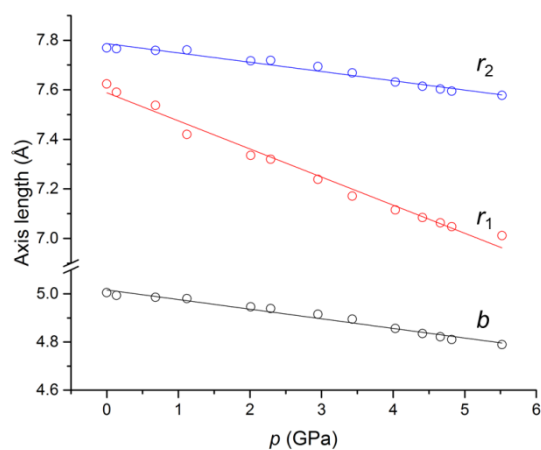

**Figure S2.** Variation of unit cell parameter *b* and wine-rack strut lengths *r*<sub>1</sub> and *r*<sub>2</sub> as a function of pressure, showing linear fits used to determine linear compressibilities.

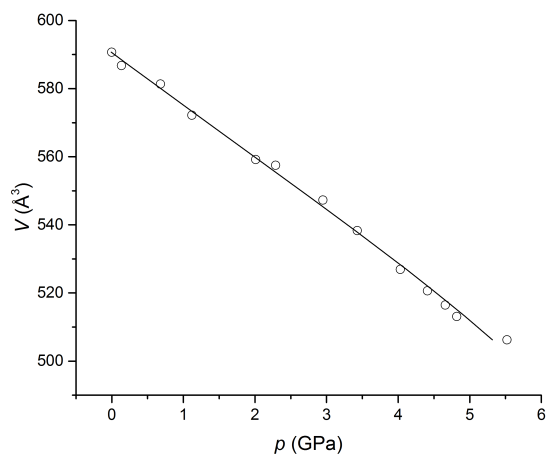

**Figure S3.** Variation of unit cell volume,  $V$ , as a function of pressure,  $p$ , showing the third-order Birch-Murnaghan fit used to determine bulk modulus,  $B_0$ .

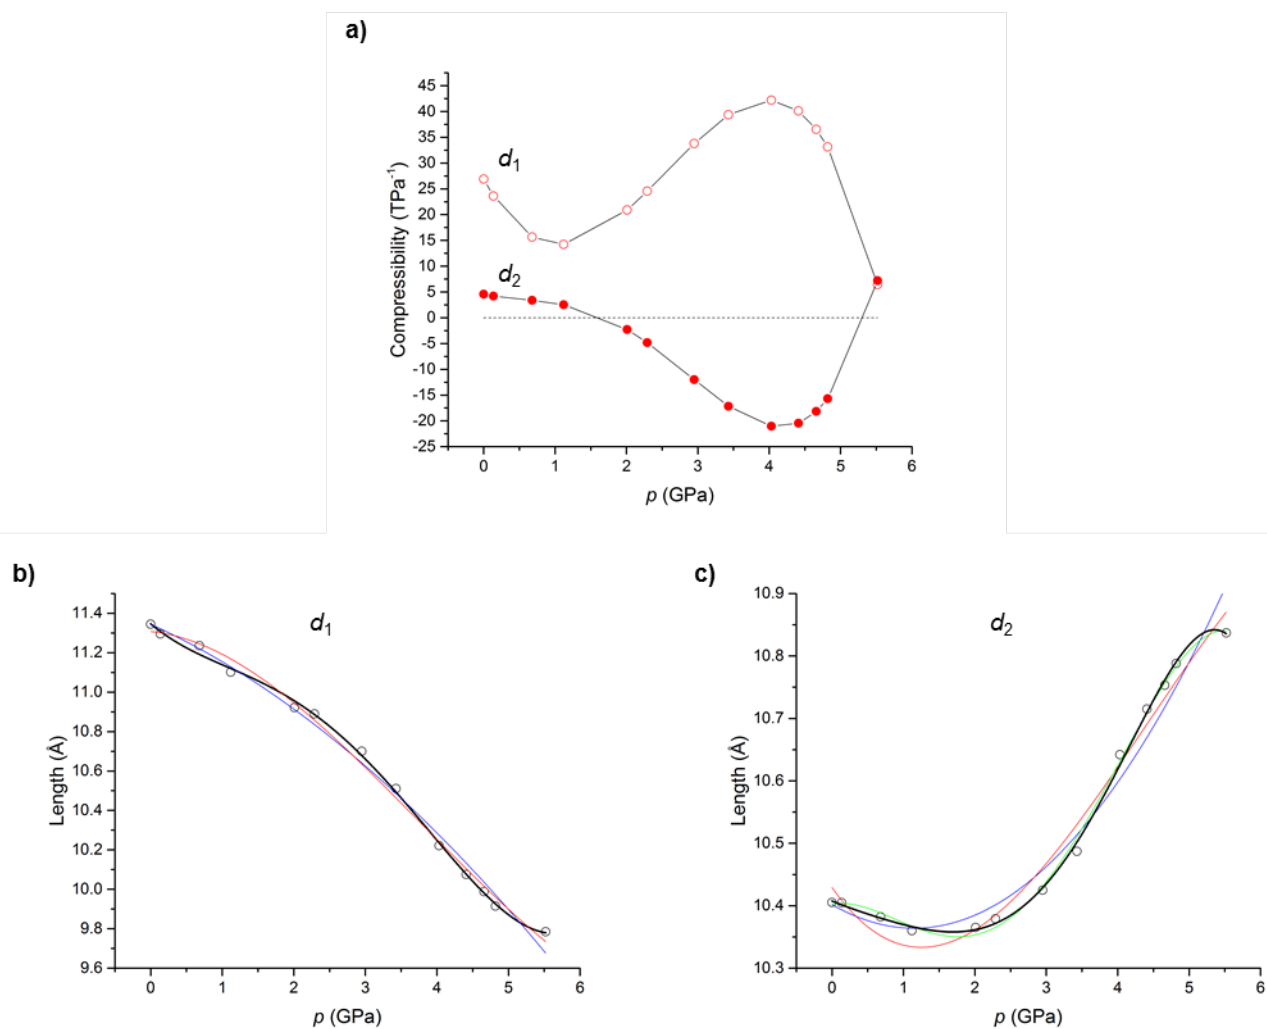

**Figure S4.** Pressure-dependent compressibility of wine-rack diagonal vectors  $d_1$  and  $d_2$  (a), calculated from polynomial fits to the data (b and c). The polynomial functions selected for calculation of compressibilities (4<sup>th</sup> and 5<sup>th</sup>-order, respectively) are shown as thick black lines, whilst less satisfactory fits are shown in blue (2<sup>nd</sup> order), red (3<sup>rd</sup> order) and green (4<sup>th</sup> order). Whilst the absolute values of compressibility at ambient pressure can be seen to depend considerably on the polynomial order used, the behaviour at elevated pressures, particularly through the PLC-NLC transition, is well modelled by the selected functions.

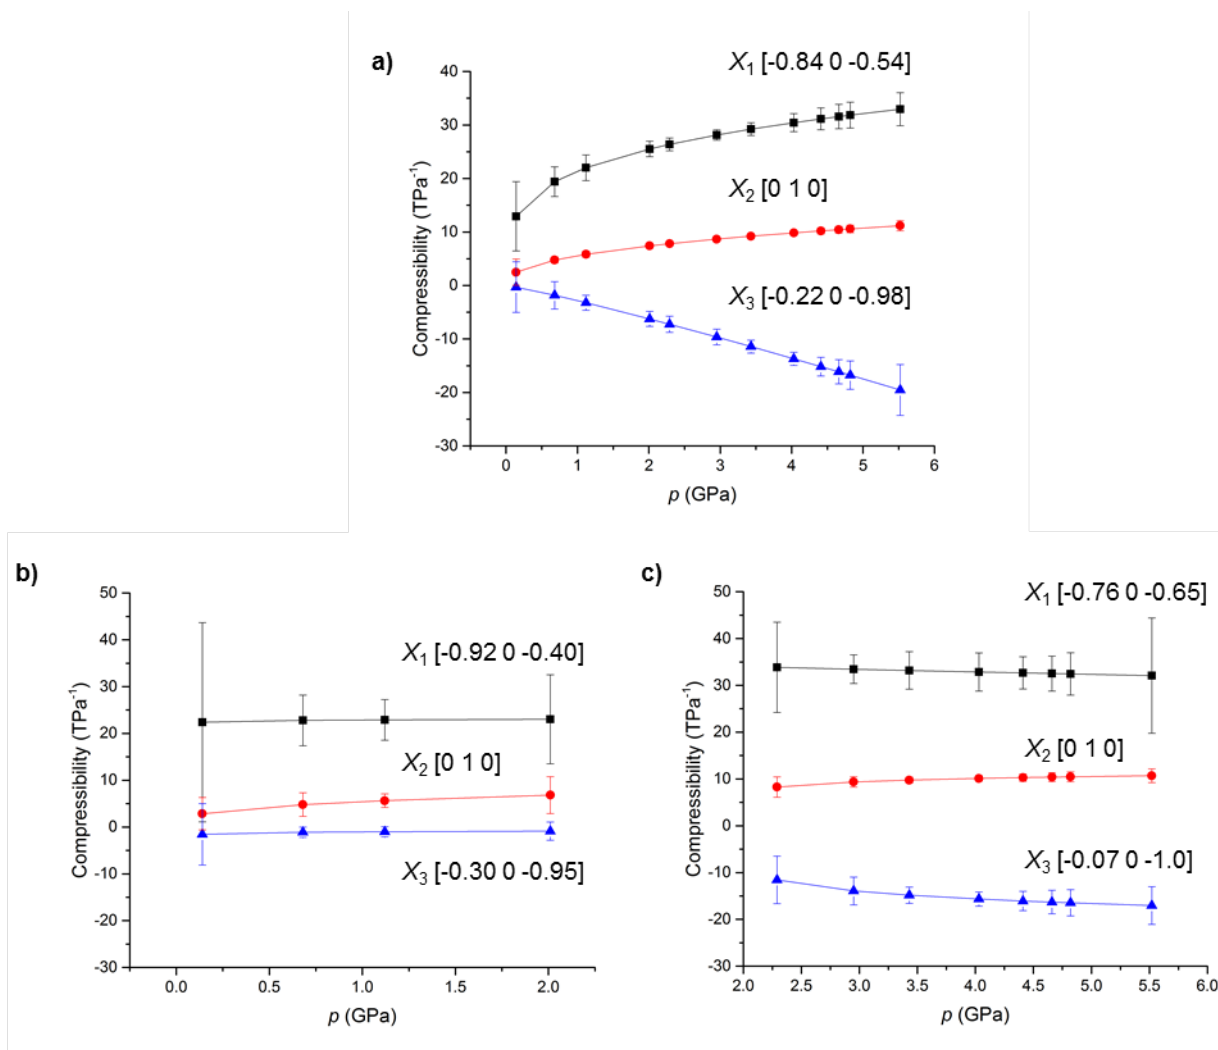

**Figure S5.** Linear compressibilities,  $K$ , vs. hydrostatic pressure,  $p$ , showing directions of principle axes,  $X$ , calculated using PASCAL<sup>12</sup> for a) all data, b) data below 2 GPa, and c) data above 2 GPa.

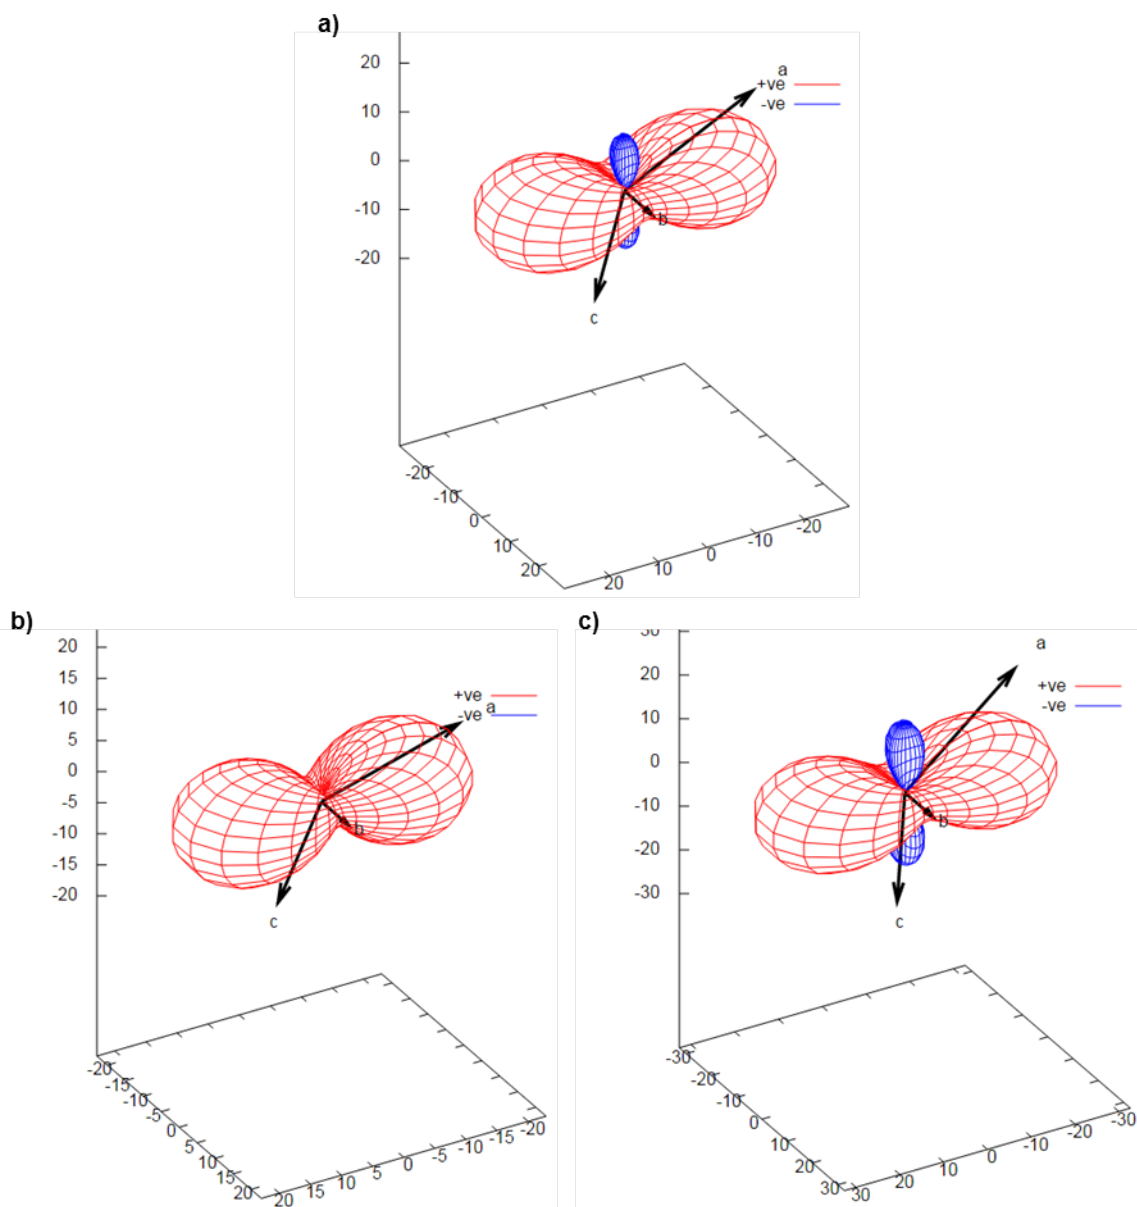

**Figure S6.** Linear compressibility indicatrices of **1**, calculated using PASCAL<sup>12</sup> for a) all data, b) data below 2 GPa, and c) data above 2 GPa. Blue = negative, red = positive compressibility; all axes in units of  $\text{TPa}^{-1}$ .

| Wine-rack axis            | $K / \text{TPa}^{-1}$ | Direction | Principle axis         | $K / \text{TPa}^{-1}$ | [100] component | [010] component | [001] component |
|---------------------------|-----------------------|-----------|------------------------|-----------------------|-----------------|-----------------|-----------------|
| i) Ambient pressure limit |                       |           | iii) 0-2.0 GPa region  |                       |                 |                 |                 |
| $d_1$                     | 26.9                  | [1 0 1]   | $X_1$                  | 23(4)                 | 0.9162          | 0               | 0.4007          |
| $b$                       | 8.0                   | [0 1 0]   | $X_2$                  | 5.6(14)               | 0               | 1               | 0               |
| $d_2$                     | 4.6                   | [0 0 1]   | $X_3$                  | -1.0(11)              | 0.3007          | 0               | 0.9537          |
| ii) 4.0 GPa               |                       |           | iv) 2.0-5.5 GPa region |                       |                 |                 |                 |
| $d_1$                     | 42.2                  | [1 0 1]   | $X_1$                  | 33(3)                 | 0.7567          | 0               | 0.6537          |
| $b$                       | 8.2                   | [0 1 0]   | $X_2$                  | 10.3(8)               | 0               | 1               | 0               |
| $d_2$                     | -21.0                 | [0 0 1]   | $X_3$                  | -16(2)                | 0.07            | 0               | 0.9975          |
|                           |                       |           | v) 0-5.5 GPa region    |                       |                 |                 |                 |
|                           |                       |           | X1                     | 29.2(12)              | 0.8428          | 0               | 0.5382          |
|                           |                       |           | X2                     | 9.2(3)                | 0               | 1               | 0               |
|                           |                       |           | X3                     | -11.4(12)             | 0.2193          | 0               | 0.9757          |

**Table S1.** Linear compressibilities,  $K$ , for wine-rack axes (calculated by polynomial fits) in i) the ambient pressure limit, and ii) at 4.0 GPa. Axes of principle strain (median compressibilities and directionalities) calculated using the PASCAL program<sup>12</sup> are shown for comparison in iii) the pressure range 0-2 GPa, iv) above 2 GPa, and v) for all data.

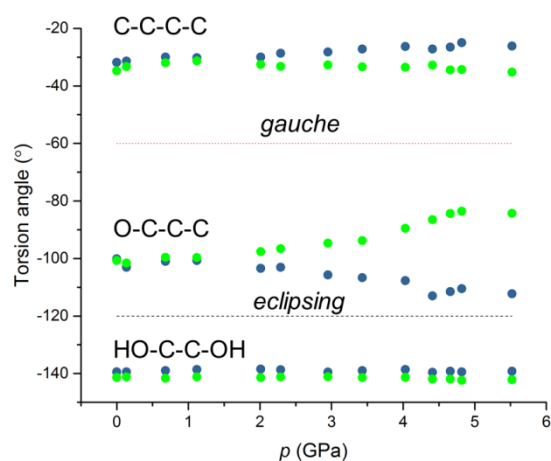

**Figure S7.** Pressure-dependent variation of the torsion angles of the tartrate ligands L1 (blue/grey) and L2 (lime green). Dotted lines mark the angles of *gauche* and *eclipsing* interactions.

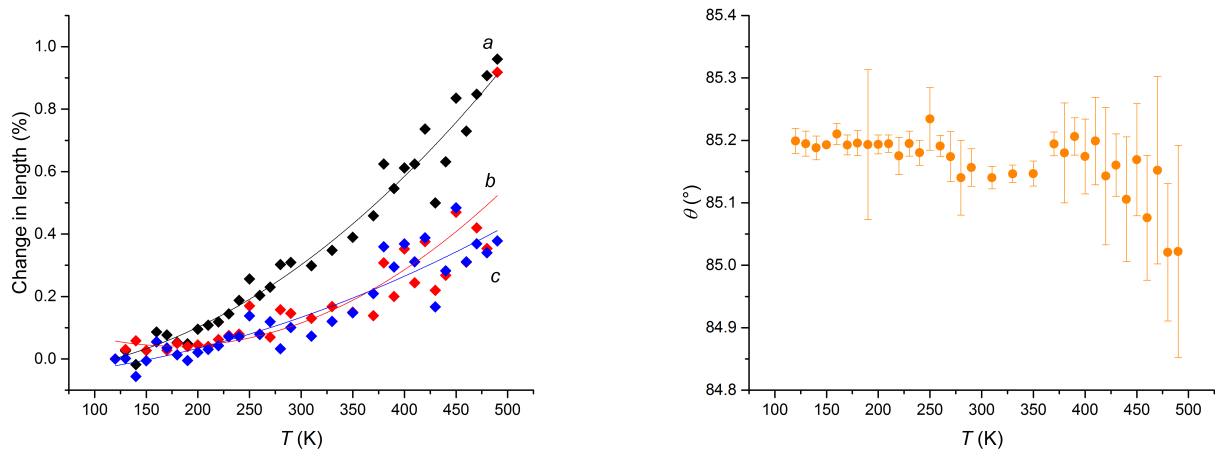

**Figure S8.** Relative changes in unit cell parameters of **1** with temperature, measured by single crystal X-ray diffraction. a) Unit cell lengths, fitted by 2<sup>nd</sup> order polynomial functions; b) wine-rack angle,  $\theta$ .

| Wine-rack axis                         | $K / \text{TPa}^{-1}$     | Principle axis | $K / \text{TPa}^{-1}$     | [100]  | [010] | [001]  |
|----------------------------------------|---------------------------|----------------|---------------------------|--------|-------|--------|
| i) 0 GPa limit                         |                           |                |                           |        |       |        |
| 0 – 2.0 GPa region.                    |                           |                |                           |        |       |        |
| $d_1$ [101]                            | 26.9                      | $X_1$          | 23(4)                     | 0.9162 | 0     | 0.4007 |
| $b$ [010]                              | 8.0                       | $X_2$          | 5.6(14)                   | 0      | 1     | 0      |
| $d_2$ [001]                            | 4.6                       | $X_3$          | -1.0(11)                  | 0.3007 | 0     | 0.9537 |
| Wine-rack axis <sup>a</sup>            | $\alpha / \text{MK}^{-1}$ | Principle axis | $\alpha / \text{MK}^{-1}$ | [100]  | [010] | [001]  |
| ii) 120 K – 490 K variable temperature |                           |                |                           |        |       |        |
| $d_1$ [101]                            | 16.4(11)                  |                |                           |        |       |        |
| $b$ [010]                              | 7.1(7)                    | $X_2$          | 13(2)                     | 0      | 1     | 0      |
| $d_2$ [001]                            | 11.7(9)                   | $X_1$          | 3.7(9)                    | 0.388  | 0     | 0.9217 |
| $r_1$ [100]                            | 24.7(11)                  | $X_3$          | 24.6(12)                  | 0.9915 | 0     | 0.13   |
| $r_2$                                  | 4.3(10)                   |                |                           |        |       |        |

**Table S2.** i) Low pressure compressibility and ii) coefficients of linear and volume thermal expansion of **1**,  $\alpha$ , and directions for the range 120 – 490 K, calculated using the PASCAL program.<sup>12</sup> <sup>a</sup>relation to the crystallographic unit cell is  $r_2 = \sqrt{\left(\left(\frac{a}{2}\right)^2 + c^2 + a \cdot c \cdot \cos \beta\right)}$ .

### S3. Crystal structure refinements

**Table S3.** Variable pressure single crystal X-ray diffraction: cell parameters (\* denotes laboratory measurement).

| P / GPa | a / Å  | sigma<br>(a) / Å | b / Å  | sigma<br>(b) / Å | c / Å   | sigma<br>(c) | $\beta$ / ° | sigma<br>( $\beta$ ) / ° | V / Å <sup>3</sup> | sigma<br>(V) / Å <sup>3</sup> | R(gt)  |
|---------|--------|------------------|--------|------------------|---------|--------------|-------------|--------------------------|--------------------|-------------------------------|--------|
| 0*      | 15.247 | 4E-4             | 5.005  | 1E-4             | 10.4052 | 3E-4         | 131.936     | 1E-3                     | 590.68             | 0.03                          | 0.0247 |
| 0.137*  | 15.181 | 0.002            | 4.9938 | 2E-4             | 10.405  | 0.002        | 131.943     | 0.006                    | 586.72             | 0.17                          | 0.0555 |
| 0.68*   | 15.075 | 0.003            | 4.9857 | 0.0015           | 10.382  | 0.004        | 131.84      | 0.02                     | 581.4              | 0.4                           | 0.1151 |
| 1.12*   | 14.84  | 0.03             | 4.98   | 0.012            | 10.36   | 0.04         | 131.64      | 0.15                     | 572                | 3                             | 0.0678 |
| 2.01    | 14.67  | 0.02             | 4.946  | 0.003            | 10.365  | 0.011        | 131.97      | 0.05                     | 559.1              | 1.1                           | 0.0295 |
| 2.29    | 14.639 | 0.007            | 4.9393 | 5E-4             | 10.379  | 0.007        | 132.027     | 0.013                    | 557.5              | 0.5                           | 0.0558 |
| 2.95    | 14.477 | 0.006            | 4.9154 | 5E-4             | 10.425  | 0.007        | 132.46      | 0.013                    | 547.3              | 0.4                           | 0.0397 |
| 3.43    | 14.342 | 0.013            | 4.8946 | 0.0011           | 10.487  | 0.014        | 133.01      | 0.03                     | 538.3              | 0.9                           | 0.0443 |
| 4.03    | 14.231 | 0.009            | 4.856  | 6E-4             | 10.642  | 0.009        | 134.234     | 0.018                    | 526.9              | 0.6                           | 0.0425 |
| 4.41    | 14.168 | 0.008            | 4.8351 | 6E-4             | 10.715  | 0.008        | 134.825     | 0.018                    | 520.6              | 0.5                           | 0.036  |
| 4.66    | 14.126 | 0.008            | 4.8218 | 6E-4             | 10.753  | 0.008        | 135.162     | 0.018                    | 516.4              | 0.5                           | 0.0454 |
| 4.82    | 14.095 | 0.008            | 4.8107 | 0.005            | 10.788  | 0.008        | 135.458     | 0.018                    | 513.1              | 0.5                           | 0.0604 |
| 5.52    | 14.024 | 0.008            | 4.789  | 6E-4             | 10.837  | 0.008        | 135.927     | 0.019                    | 506.3              | 0.5                           | 0.0409 |

**Table S4.** Variable temperature single crystal X-ray diffraction: cell parameters (\* denotes that the original monoclinic cell setting, in which the structure was solved, differed from that shown and was subsequently transformed using the matrix [1 0 -1 0 -1 0 0 0 -1]).

| T / K | a / Å   | sigma<br>(a) / Å | b / Å   | sigma<br>(b) / Å | c / Å   | sigma<br>(c) | $\beta$ / ° | sigma<br>( $\beta$ ) / ° | V / Å <sup>3</sup> | sigma<br>(V) / Å <sup>3</sup> | R(gt) |
|-------|---------|------------------|---------|------------------|---------|--------------|-------------|--------------------------|--------------------|-------------------------------|-------|
| 120   | 15.21   | 0.002            | 5.0011  | 2E-4             | 10.4146 | 0.0013       | 131.89      | 0.02                     | 589.8              | 0.2                           | 2.95  |
| 130   | 15.214  | 0.002            | 5.0026  | 3E-4             | 10.4148 | 0.0014       | 131.9       | 0.02                     | 590                | 0.3                           | 2.89  |
| 140   | 15.2073 | 0.0017           | 5.004   | 2E-4             | 10.4088 | 0.0011       | 131.901     | 0.019                    | 589.6              | 0.2                           | 2.96  |
| 150   | 15.2141 | 0.005            | 5.00244 | 1.8E-4           | 10.414  | 1E-3         | 131.903     | 0.0016                   | 589.9              | 0.17                          | 3.06  |
| 160   | 15.2231 | 0.0016           | 5.00381 | 1.9E-4           | 10.4203 | 1E-3         | 131.921     | 0.017                    | 590.61             | 0.17                          | 3.02  |
| 170   | 15.2217 | 0.0014           | 5.00249 | 1.7E-4           | 10.4183 | 1E-3         | 131.908     | 0.016                    | 590.4              | 0.16                          | 3.14  |
| 180*  | 15.218  | 0.002            | 5.00361 | 1.7E-4           | 10.416  | 0.002        | 131.91      | 0.02                     | 590.3              | 0.2                           | 3.08  |
| 190   | 15.2174 | 0.0011           | 5.00308 | 1.4E-4           | 10.4141 | 8E-4         | 131.916     | 0.12                     | 589.99             | 0.13                          | 3.15  |
| 200   | 15.2245 | 0.0013           | 5.00333 | 1.6E-4           | 10.4168 | 9E-4         | 131.929     | 0.015                    | 590.33             | 0.16                          | 3.2   |
| 210   | 15.2264 | 0.0012           | 5.0031  | 1.5E-4           | 10.4178 | 8E-4         | 131.932     | 0.014                    | 590.41             | 0.14                          | 3.12  |
| 220*  | 15.228  | 0.004            | 5.0042  | 2E-4             | 10.419  | 0.003        | 131.91      | 0.03                     | 590.8              | 0.4                           | 3.1   |
| 230*  | 15.232  | 0.002            | 5.00486 | 1.7E-4           | 10.422  | 0.002        | 131.93      | 0.02                     | 591.1              | 0.2                           | 3.24  |
| 240*  | 15.2385 | 0.0017           | 5.00507 | 1.8E-4           | 10.422  | 0.002        | 131.94      | 0.02                     | 591.2              | 0.2                           | 3.2   |
| 250   | 15.249  | 0.004            | 5.0096  | 5E-4             | 10.429  | 0.003        | 132         | 0.05                     | 592.1              | 0.5                           | 3.3   |
| 260*  | 15.241  | 0.002            | 5.0051  | 1.4E-4           | 10.4228 | 0.0017       | 131.957     | 0.017                    | 591.2              | 0.2                           | 4.35  |
| 270*  | 15.245  | 0.005            | 5.0046  | 3E-4             | 10.427  | 0.004        | 131.93      | 0.04                     | 591.8              | 0.5                           | 3.24  |
| 280   | 15.256  | 0.005            | 5.009   | 6E-4             | 10.418  | 0.004        | 131.99      | 0.06                     | 591.7              | 0.6                           | 3.245 |
| 290   | 15.257  | 0.002            | 5.0084  | 3E-4             | 10.4251 | 0.0016       | 131.97      | 0.03                     | 592.3              | 0.3                           | 3.35  |
| 310   | 15.2554 | 0.0017           | 5.0076  | 2E-4             | 10.4222 | 0.0011       | 131.963     | 0.018                    | 592                | 0.2                           | 3.13  |
| 330   | 15.2629 | 0.0013           | 5.00948 | 1.5E-4           | 10.4271 | 9E-4         | 131.971     | 0.014                    | 592.74             | 0.15                          | 3.33  |
| 350   | 15.2693 | 0.0019           | 5.0086  | 2E-4             | 10.43   | 0.0013       | 131.98      | 0.02                     | 592.9              | 0.2                           | 3.21  |
| 370   | 15.2797 | 0.0017           | 5.00803 | 1.9E-4           | 10.4364 | 0.0012       | 132.036     | 0.019                    | 593.14             | 0.1                           | 3.28  |
| 380*  | 15.305  | 0.01             | 5.0165  | 8E-4             | 10.452  | 0.008        | 132.03      | 0.08                     | 596                | 1                             | 3.1   |
| 390   | 15.293  | 0.003            | 5.0111  | 0.003            | 10.4453 | 0.0018       | 132.05      | 0.03                     | 594.4              | 0.3                           | 3.35  |
| 400   | 15.303  | 0.006            | 5.0187  | 0.009            | 10.453  | 0.004        | 132.01      | 0.06                     | 596.5              | 0.7                           | 3.15  |
| 410*  | 15.305  | 0.008            | 5.0133  | 4E-4             | 10.447  | 0.007        | 132.08      | 0.07                     | 595                | 0.8                           | 3.36  |
| 420*  | 15.322  | 0.012            | 5.0199  | 1E-3             | 10.455  | 0.011        | 132.04      | 0.11                     | 597.2              | 1.3                           | 3.32  |
| 430*  | 15.286  | 0.007            | 5.0121  | 4E-4             | 10.432  | 0.006        | 132.05      | 0.05                     | 593.5              | 0.6                           | 3.57  |
| 440*  | 15.306  | 0.012            | 5.0145  | 1E-3             | 10.444  | 0.01         | 132         | 0.1                      | 595.7              | 1.2                           | 3.44  |
| 450   | 15.337  | 0.009            | 5.0246  | 0.0011           | 10.465  | 0.006        | 132.07      | 0.09                     | 598.7              | 0.1                           | 3.68  |
| 460*  | 15.321  | 0.012            | 5.0166  | 0.0011           | 10.447  | 0.011        | 132.01      | 0.1                      | 596.6              | 1.2                           | 3.59  |
| 470*  | 15.339  | 0.018            | 5.0221  | 0.0013           | 10.453  | 0.016        | 132.13      | 0.15                     | 597.2              | 1.9                           | 3.83  |
| 480*  | 15.348  | 0.013            | 5.0188  | 0.0011           | 10.45   | 0.012        | 132.04      | 0.11                     | 597.8              | 1.4                           | 4.07  |
| 490   | 15.356  | 0.014            | 5.047   | 0.002            | 10.454  | 0.012        | 132.05      | 0.17                     | 601.6              | 1.8                           | 7.48  |

## Notes and references

1. S. A. Moggach, D. R. Allan, S. Parsons, and J. E. Warren, *J. Appl. Crystallogr.*, 2008, **41**, 249–251.
2. G. J. Piermarini, S. Block, J. D. Barnett, and R. A. Forman, *J. Appl. Phys.*, 1975, **46**, 2774–2780.
3. G. M. Sheldrick, *Acta Crystallogr. Sect. A Found. Crystallogr.*, 2008, **64**, 112–22.
4. P. W. Betteridge, J. R. Carruthers, R. I. Cooper, K. Prout, and D. J. Watkin, *J. Appl. Crystallogr.*, 2003, **36**, 1487–1487.
5. A. Dawson, D. R. Allan, S. Parsons, and M. Ruf, *J. Appl. Crystallogr.*, 2004, **37**, 410–416.
6. *SAINT*, Bruker-Nonius, Bruker-AXS, Madison, Wisconsin, USA, 2006.
7. S. Parsons, *SHADE*, 2004.
8. *XPREP*, Bruker-Nonius, Bruker-AXS, Madison, Wisconsin, USA, 2004.
9. *CrysAlis CCD, CrysAlis RED and associated programs*, Oxford Diffraction Ltd., Abingdon, U.K., 2006.
10. O. V. Dolomanov, L. J. Bourhis, R. J. Gildea, J. A. K. Howard, and H. Puschmann, *J. Appl. Crystallogr.*, 2009, **42**, 339–341.
11. A. B. Cairns and A. L. Goodwin, *Phys. Chem. Chem. Phys.*, 2015, **17**, 20449–20465.
12. M. J. Cliffe and A. L. Goodwin, *J. Appl. Crystallogr.*, 2012, **45**, 1321–1329.
